# Supplementary material for: Vertical profiles of sediment methanogenic potential and communities in two plateau freshwater lakes
Source: Copernicus journal article supplement (doi:10.5194/bg-14-341-2017), 2017-01-24

Supplement of Biogeosciences, 14, 341–351, 2017  
<http://www.biogeosciences.net/14/341/2017/>  
doi:10.5194/bg-14-341-2017-supplement  
© Author(s) 2017. CC Attribution 3.0 License.

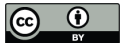

Biogeosciences  Open Access

*Supplement of*

## **Vertical profiles of sediment methanogenic potential and communities in two plateau freshwater lakes**

**Yuyin Yang et al.**

*Correspondence to:* Shuguang Xie (xiesg@pku.edu.cn) and Yong Liu (yongliu@pku.edu.cn)

The copyright of individual parts of the supplement might differ from the CC-BY 3.0 licence.

**Figure S1** Methanogen community compositions based on 16S rRNA gene. Samples D1–D6 and E1–E6 were from Dianchi Lake and Erhai Lake, respectively. Samples D1–D6 and E1–E6 were retrieved from Dianchi Lake and Erhai Lake, respectively. Digits “1” – “6” were referred to sediment depth 0–5, 5–8, 8–11, 11–14, 14–17 and 17–20 cm, respectively.

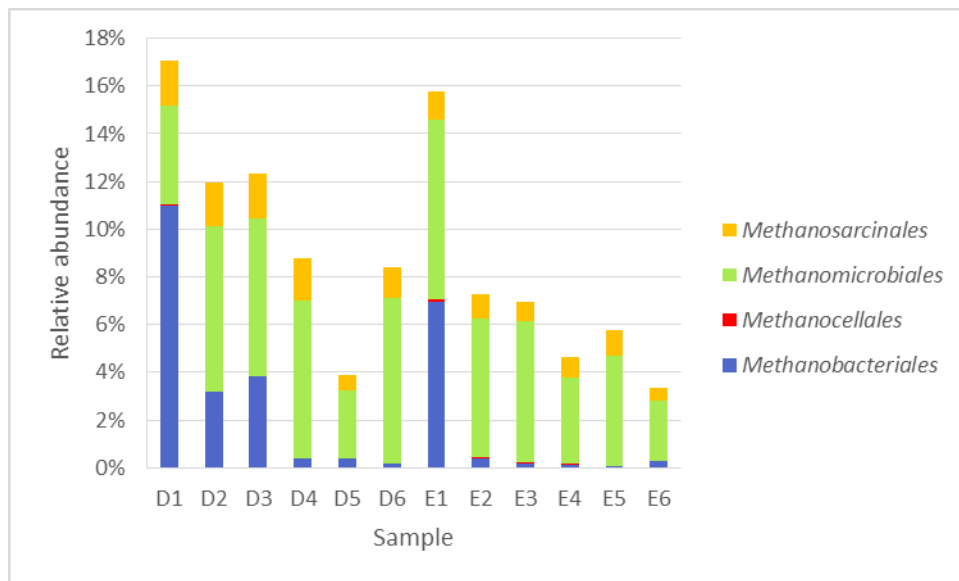

**Figure S2** Methanogen community compositions based on *mcrA* gene. Samples D1–D6 and E1–E6 were from Dianchi Lake and Erhai Lake, respectively. Samples D1–D6 and E1–E6 were retrieved from Dianchi Lake and Erhai Lake, respectively. Digits “1” – “6” were referred to sediment depth 0–5, 5–8, 8–11, 11–14, 14–17 and 17–20 cm, respectively.

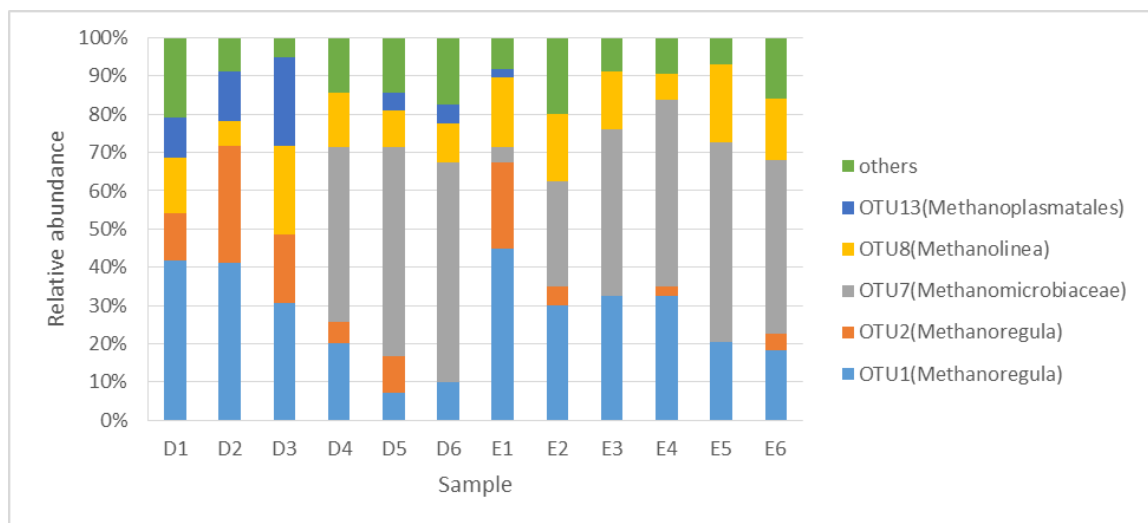

**Figure S3** Physicochemical features of sediment samples from Dianchi Lake and Erhai Lake

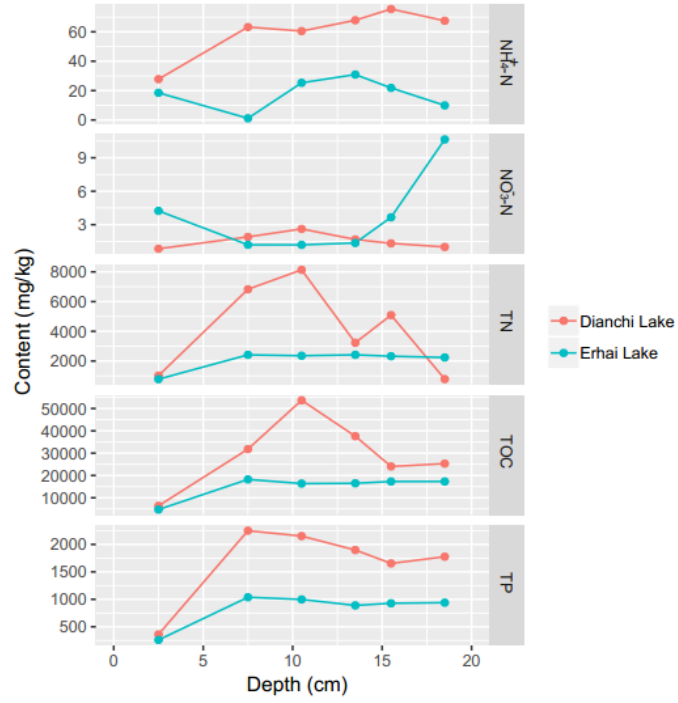

Supplement: Supplementary file 1 [file bg-14-341-2017-supplement.pdf]
